# Supplementary material
Source: PubMed Central journal article supplement (PMC406457)

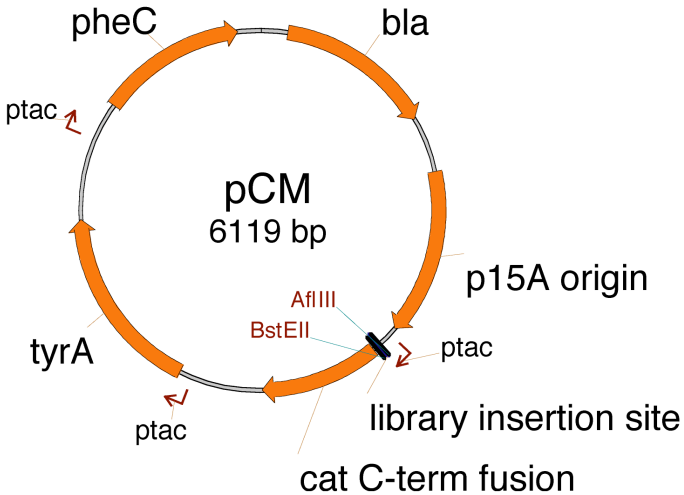

Supplement: pnas_101_18_7011__1.pdf [file pnas_101_18_7011__1.pdf]
